# Supplementary material for: Intermolecular interaction influenced energy and sensitivity of highly energetic salts: structure and physicochemical properties
Source: Royal Society of Chemistry journal article supplement (doi:10.1039/c4ce00259h), 2014-01-01
Supplement: c4ce00259h1.pdf [file c4ce00259h1.pdf]

## Supporting Information

Table of Contents

**Figure S1.** XRPD curves of **1** (a), **2** (b) and **3** (c).

**Table S1.** Selected bond lengths (Å) and angles (°) for **1–3**.

**Table S2.** Hydrogen bond lengths (Å) and angles (°) for **1–3**.

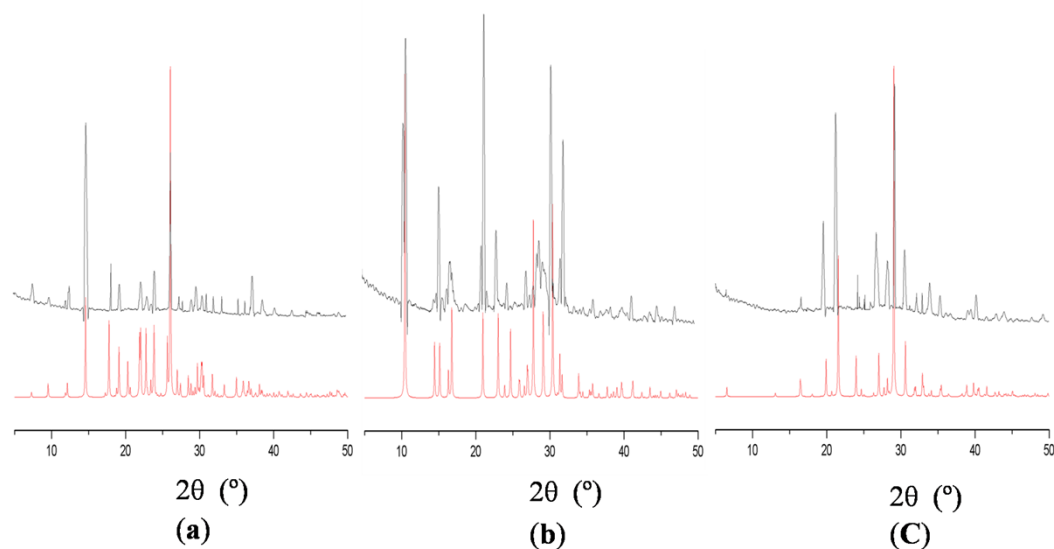





**Table S1.**

Selected bond lengths (Å) and angles (°) for **1–3**.

|           |                 |           |                  |                |
|-----------|-----------------|-----------|------------------|----------------|
| <b>1</b>  | N(1)-C(3)       | 1.333(4)  | C(3)-N(1)-C(2)   | 122.1(3)       |
|           | N(1)-N(3)       | 1.319(5)  | N(3)-N(1)-C(2)   | 129.5(3)       |
|           | N(1)-C(2)       | 1.455(4)  | N(3)-N(4)-N(2)   | 105.2(3)       |
|           | N(4)-N(3)       | 1.316(5)  | C(3)-N(2)-N(4)   | 110.6(3)       |
|           | N(4)-N(2)       | 1.356(5)  | N(4)-N(3)-N(1)   | 108.8(3)       |
|           | N(2)-C(3)       | 1.274(5)  | C(5)-N(7)-C(6)   | 116.3(3)       |
|           | N(7)-C(5)       | 1.332(4)  | C(4)-N(9)-C(6)   | 115.5(3)       |
|           | N(7)-C(6)       | 1.338(4)  | C(4)-N(6)-C(5)   | 119.9(3)       |
|           | N(9)-C(4)       | 1.330(4)  | C(4)-N(6)-H(5)   | 120.1          |
|           | N(9)-C(6)       | 1.351(4)  | C(5)-N(6)-H(5)   | 120.1          |
|           | N(6)-C(4)       | 1.353(4)  | N(5)-C(4)-N(9)   | 120.6(3)       |
|           | N(6)-C(5)       | 1.362(4)  | N(5)-C(4)-N(6)   | 117.8(3)       |
|           | N(6)-H(5)       | 0.8600    | N(9)-C(4)-N(6)   | 121.5(3)       |
|           | C(4)-N(5)       | 1.315(4)  | N(8)-C(6)-N(7)   | 117.7(3)       |
|           | C(6)-N(8)       | 1.328(4)  | N(8)-C(6)-N(9)   | 116.2(3)       |
|           | C(5)-N(10)      | 1.300(4)  | N(7)-C(6)-N(9)   | 126.1(3)       |
|           | C(3)-H(8)       | 0.9300    | N(10)-C(5)-N(7)  | 121.2(3)       |
|           | C(2)-C(1)       | 1.516(5)  | N(10)-C(5)-N(6)  | 118.2(3)       |
|           | C(2)-H(12)      | 0.91(4)   | N(7)-C(5)-N(6)   | 120.6(3)       |
|           | C(2)-H(9)       | 0.914(19) | N(2)-C(3)-N(1)   | 107.1(3)       |
|           | C(1)-O(2)       | 1.228(4)  | N(2)-C(3)-H(8)   | 126.5          |
|           | C(1)-O(3)       | 1.256(4)  | N(1)-C(3)-H(8)   | 126.5          |
|           | O(1)-H(10)      | 0.95(4)   | N(1)-C(2)-C(1)   | 113.0(3)       |
|           | O(1)-H(11)      | 0.90(5)   | N(1)-C(2)-H(12)  | 106(3)         |
|           | N(8)-H(2)       | 0.8600    | C(1)-C(2)-H(12)  | 107(3)         |
|           | N(5)-H(4)       | 0.8600    | N(1)-C(2)-H(9)   | 108(3)         |
|           | N(5)-H(3)       | 0.8600    | C(1)-C(2)-H(9)   | 104(3)         |
|           | N(10)-H(7)      | 0.8600    | H(12)-C(2)-H(9)  | 118(4)         |
|           | N(10)-H(6)      | 0.8600    | O(2)-C(1)-O(3)   | 126.6(3)       |
|           | H(7)-N(10)-H(6) | 0.8600    | O(2)-C(1)-C(2)   | 119.2(3)       |
|           | C(5)-N(10)-H(6) | 120.0     | O(3)-C(1)-C(2)   | 114.2(3)       |
|           | H(4)-N(5)-H(3)  | 120.0     | H(10)-O(1)-H(11) | 93(4)          |
|           | H(4)-N(5)-H(3)  | 120.0     | C(6)-N(8)-H(1)   | 120.0          |
|           | C(4)-N(5)-H(3)  | 120.0     | C(6)-N(8)-H(2)   | 120.0          |
|           | C(4)-N(5)-H(4)  | 120.0     | H(1)-N(8)-H(2)   | 120.0          |
|           | <b>2</b>        | N(2)-C(2) | 1.335(4)         | C(2)-N(2)-H(4) |
| N(2)-N(5) |                 | 1.366(4)  | N(5)-N(2)-H(4)   | 126(3)         |
| N(2)-H(4) |                 | 1.06(6)   | N(5)-N(4)-N(3)   | 108.7(3)       |
| N(4)-N(5) |                 | 1.269(4)  | C(2)-N(3)-N(4)   | 109.1(3)       |
| N(4)-N(3) |                 | 1.360(4)  | C(2)-N(3)-H(1)   | 125.4          |
| N(3)-C(2) |                 | 1.329(4)  | N(4)-N(3)-H(1)   | 125.4          |
| N(3)-H(1) |                 | 0.8600    | N(4)-N(5)-N(2)   | 107.6(3)       |

|   |                  |            |                  |            |
|---|------------------|------------|------------------|------------|
|   | N(1)-C(2)        | 1.322(5)   | C(2)-N(1)-H(2)   | 120.0      |
|   | N(1)-H(2)        | 0.8600     | C(2)-N(1)-H(3)   | 120.0      |
|   | N(1)-H(3)        | 0.8600     | H(2)-N(1)-H(3)   | 120.0      |
|   | O(2)-C(1)        | 1.280(4)   | N(1)-C(2)-N(3)   | 127.8(3)   |
|   | O(1)-C(1)        | 1.217(4)   | N(1)-C(2)-N(2)   | 126.8(3)   |
|   | C(1)-C(1)#1      | 1.548(6)   | N(3)-C(2)-N(2)   | 105.4(3)   |
|   | C(2)-N(2)-N(5)   | 109.2(3)   | O(1)-C(1)-O(2)   | 126.2(3)   |
|   | O(2)-C(1)-C(1)#1 | 113.8(3)   | O(1)-C(1)-C(1)#1 | 120.0(3)   |
| 3 | O(1)-N(1)        | 1.234(2)   | C(2)-N(4)-H(4)   | 132.3(15)  |
|   | O(2)-N(1)        | 1.248(2)   | N(3)-N(4)-H(4)   | 119.6(15)  |
|   | O(3)-N(1)        | 1.239(2)   | C(1)-N(5)-C(2)   | 108.62(17) |
|   | O(4)-N(2)        | 1.237(2)   | C(1)-N(5)-H(5)   | 128.5(19)  |
|   | O(5)-N(2)        | 1.209(2)   | C(2)-N(5)-H(5)   | 122.8(19)  |
|   | O(6)-N(2)        | 1.256(2)   | C(1)-N(6)-H(6A)  | 119.3(17)  |
|   | N(3)-C(1)        | 1.320(3)   | C(1)-N(6)-H(6B)  | 121.8(17)  |
|   | N(3)-N(4)        | 1.388(3)   | H(6A)-N(6)-H(6B) | 119(2)     |
|   | N(3)-H(3)        | 0.84(2)    | C(2)-N(7)-H(7A)  | 120.1(14)  |
|   | N(4)-C(2)        | 1.314(3)   | H(7A)-N(7)-H(7B) | 118.5(18)  |
|   | N(4)-H(4)        | 0.92(2)    | N(6)-C(1)-N(3)   | 121(2)     |
|   | N(5)-C(1)        | 1.355(3)   | N(6)-C(1)-N(5)   | 126.7(2)   |
|   | N(5)-C(2)        | 1.358(3)   | N(3)-C(1)-N(5)   | 125.66(19) |
|   | N(5)-H(5)        | 0.83(3)    | N(7)-C(2)-N(4)   | 107.61(17) |
|   | N(6)-C(1)        | 1.312(3)   | N(7)-C(2)-N(5)   | 126.8(2)   |
|   | N(6)-H(6A)       | 0.82(3)    | N(7)-C(2)-N(5)   | 125.4(2)   |
|   | N(6)-H(6B)       | 0.93(3)    | N(4)-C(2)-N(5)   | 107.70(18) |
|   | N(7)-C(2)        | 1.312(3)   | O(1)-N(1)-O(3)   | 119.77(18) |
|   | N(7)-H(7A)       | 0.99(2)    | O(1)-N(1)-O(2)   | 119.60(18) |
|   | N(7)-H(7B)       | 0.84(3)    | O(3)-N(1)-O(2)   | 120.60(18) |
|   | O(4)-N(2)-O(6)   | 118.58(17) | O(5)-N(2)-O(4)   | 120.83(17) |
|   | C(1)-N(3)-N(4)   | 107.95(17) | O(5)-N(2)-O(6)   | 120.57(17) |
|   | C(1)-N(3)-H(3)   | 130.9(15)  | N(4)-N(3)-H(3)   | 120.3(15)  |
|   | C(2)-N(4)-N(3)   | 108.06(17) |                  |            |

Symmetry transformations used to generate equivalent atoms: #1 -x+1,-y+1,-z+1.

**Table S2.**

Hydrogen bond lengths (Å) and angles (°) for **1–3**.

|          | d(D-H...A) [Å]       | d(D-H) [Å] | d(H...A)[Å] | d(D...A) [Å] | <(DHA) [ ° ] |
|----------|----------------------|------------|-------------|--------------|--------------|
| <b>1</b> | O(1)-H(11) ...O(3)#1 | 0.90(5)    | 1.91(5)     | 2.773(4)     | 162(4)       |
|          | N(10)-H(6) ...N(4)#2 | 0.86       | 2.11        | 2.939(4)     | 161.8        |
|          | N(10)-H(7) ...N(7)#3 | 0.86       | 2.19        | 3.047(4)     | 175.8        |
|          | N(5)-H(3) ...O(3)#4  | 0.86       | 2.32        | 2.849(4)     | 120.4        |
|          | N(5)-H(4) ...N(9)#5  | 0.86       | 2.16        | 3.016(4)     | 178.0        |
|          | N(8)-H(2) ...O(3)#6  | 0.86       | 2.04        | 2.830(4)     | 152.6        |
|          | N(8)-H(1) ...N(2)#7  | 0.86       | 2.22        | 3.022(4)     | 154.8        |
|          | O(1)-H(10) ...O(2)   | 0.95(4)    | 1.81(5)     | 2.754(4)     | 173(4)       |
|          | N(5)-H(3) ...O(1)    | 0.86       | 2.39        | 3.095(4)     | 139.2        |
|          | N(6)-H(5) ...O(1)    | 0.86       | 1.88        | 2.707(4)     | 160.6        |
| <b>2</b> | N(2)-H(4) ...O(1)#2  | 1.06(6)    | 2.12(6)     | 2.872(4)     | 126(4)       |
|          | N(2)-H(4) ...O(2)#3  | 1.06(6)    | 1.82(6)     | 2.710(4)     | 138(5)       |
|          | N(1)-H(3) ...O(1)#2  | 0.86       | 2.31        | 2.994(4)     | 137.2        |
|          | N(1)-H(2) ...N(5)#4  | 0.86       | 2.33        | 3.184(5)     | 175.8        |
|          | N(3)-H(1) ...O(2)#5  | 0.86       | 1.70        | 2.561(3)     | 173.9        |
| <b>3</b> | N3-H3...O6           | 0.84(2)    | 1.82(2)     | 2.655(2)     | 176(2)       |
|          | N3-H3...O5           | 0.84(2)    | 2.51(2)     | 3.072(2)     | 125.7(19)    |
|          | N4-H4...O4#1         | 0.92(2)    | 1.82(2)     | 2.737(2)     | 172(2)       |
|          | N4-H4...O5           | 0.92(2)    | 2.55(2)     | 3.126(2)     | 120.6(18)    |
|          | N5-H5...O3           | 0.83(3)    | 1.93(3)     | 2.752(2)     | 171(3)       |
|          | N6-H6A...O1#2        | 0.82(3)    | 2.46(3)     | 3.122(3)     | 139(2)       |
|          | N6-H6A...O2#2        | 0.82(3)    | 2.53(3)     | 3.327(3)     | 167(2)       |
|          | N6-H6B...O1#3        | 0.93(3)    | 2.01(3)     | 2.920(3)     | 166(2)       |
|          | N6-H6B...O3#3        | 0.93(3)    | 2.34(3)     | 3.069(2)     | 136(2)       |
|          | N7-H7A...O4#4        | 0.99(2)    | 2.18(2)     | 2.970(2)     | 135.9(19)    |
|          | N7-H7A...O5#5        | 0.99(2)    | 2.18(2)     | 3.101(3)     | 154.4(19)    |
|          | N7-H7B...O2          | 0.84(3)    | 2.10(3)     | 2.940(3)     | 172(3)       |
|          | N7-H7B...O6#4        | 0.84(3)    | 2.54(3)     | 3.016(3)     | 117(2)       |

Symmetry transformations used to generate equivalent atoms for **1**: #1 -x,-y,-z+1; #2 x-1,y,z; #3 -x,-y+1,-z; #4 -x+1,-y,-z+1; #5 -x+2,-y,-z; #6 x+1,y,z-1; #7 -x+1,-y+1,-z.

Symmetry transformations used to generate equivalent atoms for **2**: #1 -x+1,-y+1,-z+1; #2 x,-y+3/2,z-1/2; #3 -x+1,y+1/2,-z+1/2; #4 -x,y-1/2,-z+1/2; #5 x-1,y,z.

Symmetry transformations used to generate equivalent atoms for **3**: #1 -x, y+1/2, -z+1/2; #2 x, y-1, z; #3 -x+1, y-1/2, -z+3/2; #4 x, y+1, z; #5 -x, y+1/2, -z+1/2.
